# Supplementary material
Source: PubMed Central journal article supplement (PMC3081198)
Supplement: mmc1.pdf [file mmc1.pdf]

**Supplemental Table 1. Hematological values and hemodynamic parameters of the dermal microcirculation.**

| <b>Dermal Venules</b>                           |                 |                 |                            |                               |                 |                               |                               |                                 |                            |
|-------------------------------------------------|-----------------|-----------------|----------------------------|-------------------------------|-----------------|-------------------------------|-------------------------------|---------------------------------|----------------------------|
|                                                 | WT              | WT              | <i>Cd44</i> <sup>-/-</sup> | <i>Selp</i> lg <sup>-/-</sup> | DKO             | <i>Selp</i> lg <sup>-/-</sup> | <i>Selp</i> lg <sup>-/-</sup> | <i>Selp/Sele</i> <sup>-/-</sup> | <i>Fut7</i> <sup>-/-</sup> |
| OXA                                             | -               | +               | +                          | +                             | +               | +                             | +                             | +                               | +                          |
| $\alpha$ Esel                                   | -               | -               | -                          | -                             | -               | +                             | -                             | -                               | -                          |
| H'ase                                           | -               | -               | -                          | -                             | -               | -                             | +                             | -                               | -                          |
| WBC                                             | 4.9<br>± 0.6    | 4.9<br>± 0.6    | 5.1<br>± 0.6               | 9.5<br>± 0.8                  | 9.5<br>± 0.5    | 8.1<br>± 1.1                  | 6.2<br>± 0.4                  | 23.0<br>± 2.6                   | 21.5<br>± 1.4              |
| %CD4                                            | 7.9<br>± 0.8    | 7.9<br>± 0.8    | 8.6<br>± 1.1               | 4.0<br>± 0.3                  | 4.1<br>± 0.7    | 4.3<br>± 0.7                  | 3.8<br>± 0.3                  | 3.0<br>± 0.5                    | 5.1<br>± 0.5               |
| % Gr-1                                          | 64.6<br>± 3.3   | 64.6<br>± 3.3   | 63.0<br>± 4.0              | 80.8<br>± 0.9                 | 75.7<br>± 2.5   | 80.2<br>± 4.5                 | 75.7<br>± 3.0                 | 89.4<br>± 1.3                   | 79.8<br>± 1.8              |
| V <sub>D</sub>                                  | 50.3<br>± 3.2   | 57.7<br>± 3.1   | 45.7<br>± 3.8              | 50.5<br>± 5.1                 | 53.3<br>± 2.9   | 77.2<br>± 2.5                 | 57.2<br>± 3.5                 | 42.4<br>± 4.2                   | 36.7<br>± 2.7              |
| V <sub>RBC</sub>                                | 0.46<br>± 0.03  | 0.51<br>± 0.04  | 0.47<br>± 0.04             | 0.44<br>± 0.03                | 0.53<br>± 0.07  | 1.8<br>± 0.1                  | 0.67<br>± 0.05                | 0.48<br>± 0.07                  | 0.74<br>± 0.04             |
| $\gamma$ (s <sup>-1</sup> )<br>x10 <sup>3</sup> | 0.105<br>± 0.01 | 0.098<br>± 0.01 | 0.118<br>± 0.01            | 0.122<br>± 0.02               | 0.114<br>± 0.01 | 0.25<br>± 0.02                | 0.126<br>± 0.01               | 0.125<br>± 0.01                 | 0.229<br>± 0.02            |
| venules<br>(mice)                               | 24<br>(7)       | 25<br>(7)       | 19<br>(6)                  | 15<br>(8)                     | 18<br>(6)       | 25<br>(5)                     | 14<br>(4)                     | 14<br>(4)                       | 16<br>(4)                  |

Blood samples obtained by retro-orbital bleeding of mice 8 h after challenge with 0.5% oxazolone were used to determine leukocyte counts (WBC), and the percentage of CD4+ and Gr-1+ cells in blood was assessed by flow cytometry. Hemodynamic values (V<sub>D</sub>, vessel diameter; V<sub>RBC</sub>, centerline velocity and  $\gamma$ , wall shear rate) were obtained from intravital microscopy analyses of the dermal microcirculation. Values for non-inflamed (OXA -) dermal tissues in wild-type mice were obtained from animals in which the right ear was challenged with oxazolone (OXA +) and the left ear with vehicle, and thus the hematological values coincide for both WT groups. Values are means ± SEM. H'ase, hyaluronidase.
