# Supplementary material
Source: PubMed Central journal article supplement (PMC3081198)
Supplement: mmc2.pdf [file mmc2.pdf]

**Supplemental Table 2. Hemodynamic parameters of the cremasteric microcirculation.**

| <b>Cremasteric venules</b>                    |            |                                  |                                    |            |                                              |                                                |
|-----------------------------------------------|------------|----------------------------------|------------------------------------|------------|----------------------------------------------|------------------------------------------------|
|                                               | <b>WT</b>  | <b><i>Cd44</i><sup>-/-</sup></b> | <b><i>Selplg</i><sup>-/-</sup></b> | <b>DKO</b> | <b><i>Selplg</i><sup>-/-</sup><br/>+ 9A9</b> | <b><i>Selplg</i><sup>-/-</sup><br/>+ H'ase</b> |
| <b>V<sub>D</sub></b>                          | 29.7 ± 0.7 | 33.1 ± 0.3                       | 33.8 ± 0.8                         | 35.3 ± 0.3 | 42.8 ± 0.7                                   | 37.1 ± 0.5                                     |
| <b>V<sub>RBC</sub></b>                        | 1.6 ± 0.06 | 2.6 ± 0.05                       | 2.3 ± 0.07                         | 2.6 ± 0.05 | 1.7 ± 0.05                                   | 2.4 ± 0.07                                     |
| <b>γ (s<sup>-1</sup>)<br/>x10<sup>3</sup></b> | 1.0 ± 0.04 | 1.4 ± 0.02                       | 1.3 ± 0.04                         | 1.3 ± 0.02 | 0.7 ± 0.02                                   | 1.1 ± 0.04                                     |
| <b>venules<br/>(mice)</b>                     | 14<br>(5)  | 27<br>(7)                        | 22<br>(5)                          | 24<br>(6)  | 17<br>(4)                                    | 13<br>(3)                                      |

Hemodynamic values for the experiments involving intravital imaging of the cremasteric circulation. Values are means ± SEM. H'ase, hyaluronidase; 9A9 is a blocking anti-E-selectin antibody.
