# Supplementary material
Source: PubMed Central journal article supplement (PMC3081198)
Supplement: mmc5.pdf [file mmc5.pdf]

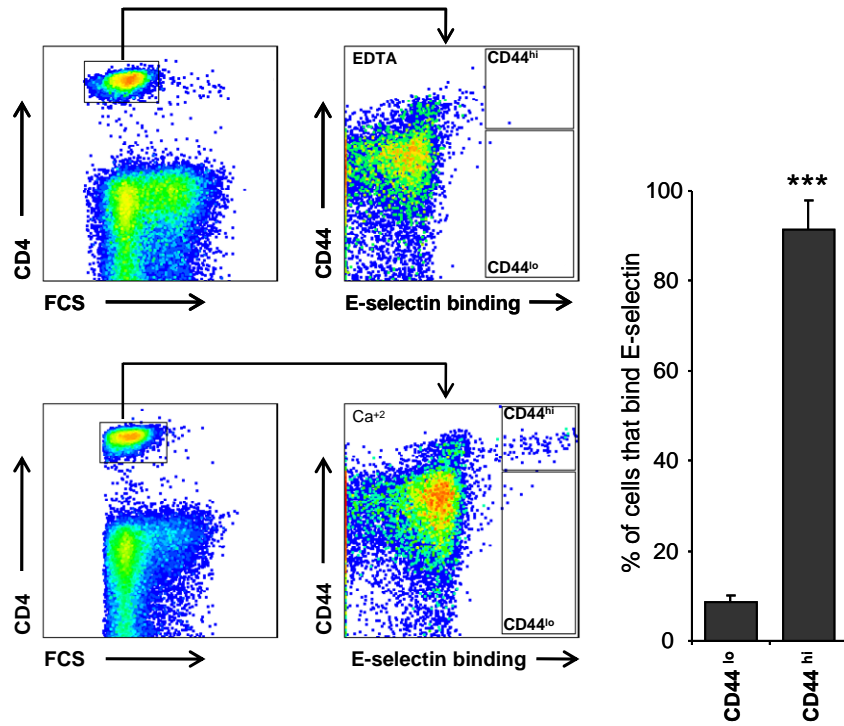

**Supplemental Figure S3. CD44<sup>hi</sup> CD4<sup>+</sup> T cells preferentially bind E-selectin.**

Flow cytometric analysis of peripheral blood leukocytes stained with anti-CD4-APC, anti-CD44-PE and an E-selectin / IgM chimera (FITC) to detect E-selectin binding. Top plots represent samples treated with 5 mM EDTA as controls for selectin binding (top plots). The vast majority of E-selectin-binding CD4<sup>+</sup> cells are within the subset that expresses high levels of CD44 (CD44<sup>hi</sup>, see regions in dot plots). No difference in this pattern is found in vehicle or oxazolone-treated mice and thus data is pooled from 4 mice of each group (total 8 mice). \*\*\*, p < 0.001.
