# Supplementary material
Source: PubMed Central journal article supplement (PMC3081198)
Supplement: mmc6.pdf [file mmc6.pdf]

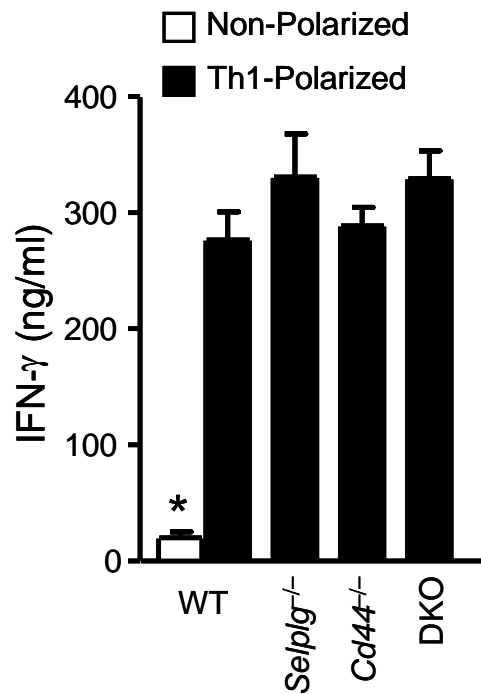

**Supplemental Figure S4. *In vitro* differentiation into Th1 cells.** Naïve T CD4<sup>+</sup> cells from the different genotypes were cultured in conditions that do or do not promote Th1 differentiation (see Materials and Methods), and after 5 days of culture the levels of IFN $\gamma$  in the supernatant were assessed by ELISA. No differences were found for polarized cells among the different experimental groups. n= 3-6 T cell cultures from different donor mice per group. \*, p<0.05 non-polarized vs. polarized WT.
