# Supplementary material
Source: PubMed Central journal article supplement (PMC3081198)
Supplement: mmc7.pdf [file mmc7.pdf]

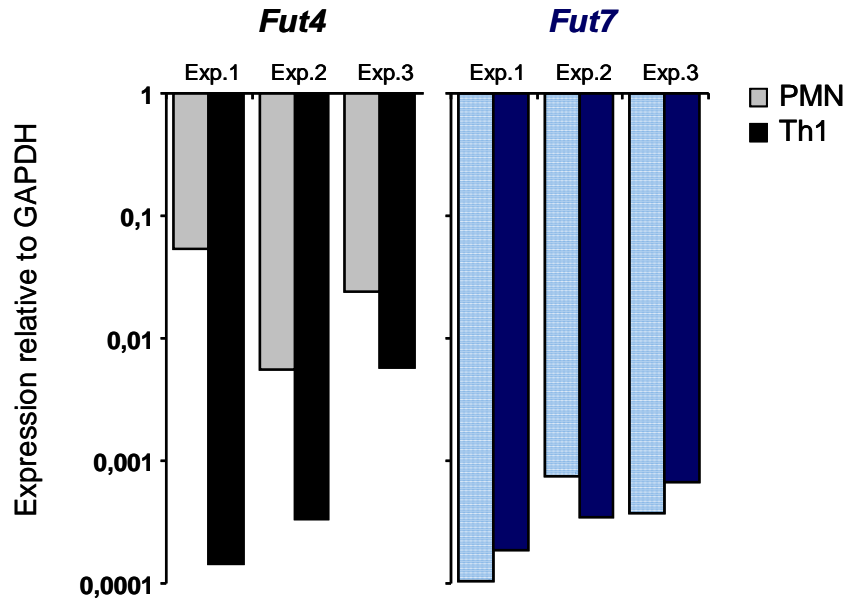

**Supplemental Figure S5. Real-time PCR analysis of the expression of *Fut4* and *Fut7* in neutrophils (PMN) and *in vitro*-generated Th1 cells.** Shown are the relative expression levels of each gene relative to GAPDH from three independent experiments (Exp.1-3). Note that the y-axis is in the logarithmic scale.
