# Supplementary material
Source: PubMed Central journal article supplement (PMC3081198)
Supplement: mmc8.pdf [file mmc8.pdf]

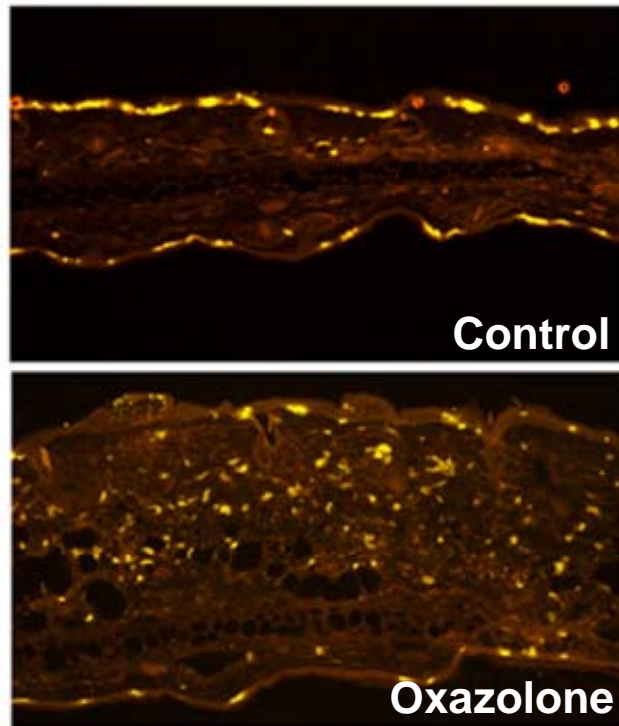

**Supplemental Figure S6. T cell recruitment in oxazolone-induced inflammation.**

Immunostaining of T cells in sections from vehicle (control) and oxazolone-treated ears with an anti-CD3 antibody. Note that the majority of T cells recruited during inflammation are in the parenchyma and not in the dermis.
