# Supplementary material
Source: PubMed Central journal article supplement (PMC3081198)
Supplement: mmc9.pdf [file mmc9.pdf]

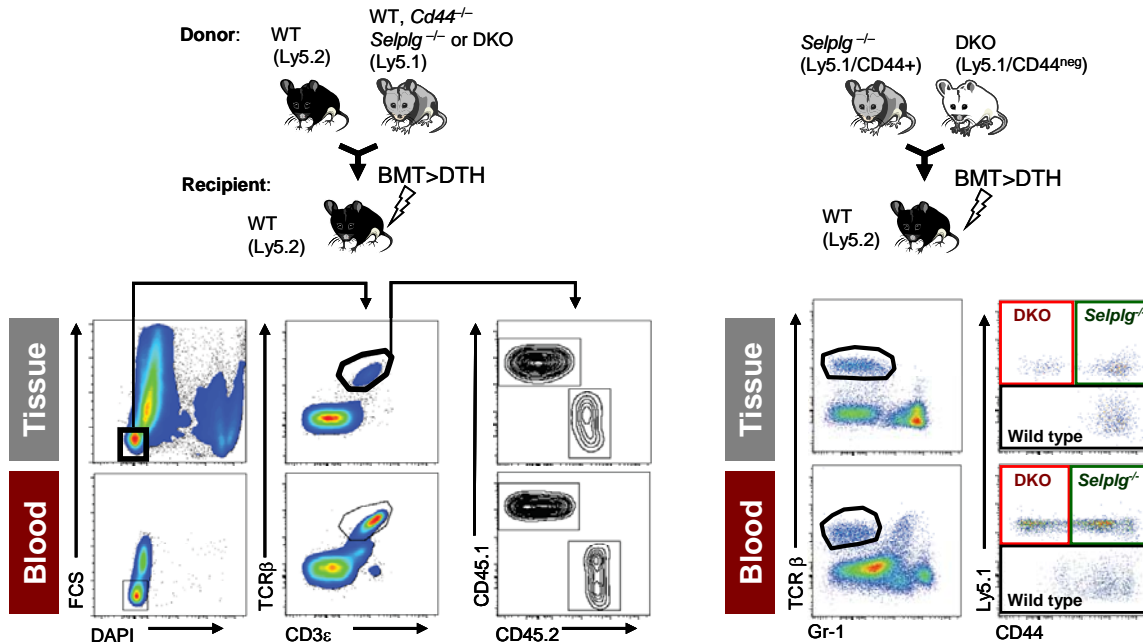

**Supplemental Figure S7. Analysis of the competitive recruitment of inflammatory T lymphocytes.** Chimeric mice generated by bone marrow transplantation (BMT) were used to compare the recruitment of wild-type (Ly5.2) and experimental (Ly5.1) T lymphocytes to inflamed tissues in a model of delayed-type hypersensitivity (DTH) (top left scheme). Flow cytometric analyses used for the identification of each competing population are shown in the bottom plots. A similar competitive system was established where the behavior of *Selp*<sup>g</sup><sup>-/-</sup> and DKO T cells was compared (right top panel). In this case, TCRβ<sup>+</sup> lymphocytes of each genotype were distinguished on the basis of CD44 expression, and from recipient-derived (wild-type, Ly5.2) T cells by expression of the Ly5.1 antigen. The fraction of T cells of each genotype recruited to inflamed tissues was corrected using their relative levels in blood.
